# Supplementary material
Source: HighWire-hosted journal article supplement (https://meilu.jpshuntong.com/content/suppl/2016/03/14/bmj.i1226)
Supplement: henniganzika.ja.pdf [file henniganzika.ja.pdf]

# Brasil luta para controlar a epidemia de Zika

**Tom Hennigan** visita o Recife, cidade brasileira no centro daquilo que agora é uma emergência mundial de saúde, para ver como o sistema de saúde pública do país está lidando com a situação

**S**ilvana Nascimento já estava no terceiro trimestre de gestação quando os médicos perceberam que o feto provavelmente tinha microcefalia. E, ainda assim, os sinais de alerta foram percebidos somente depois que ela foi transferida do vilarejo rural onde vive até um hospital público a 170 km dali, na cidade de Recife, por conta de complicações associadas com o diabetes.

Aos 23 anos, esta mãe de três crianças não sabia dos riscos associados ao vírus da Zika, transmitido pelo mosquito, até engravidar, não estava excessivamente preocupada. “Ninguém aqui da nossa região deu à luz bebês com cabeça pequena, e, se eu contraí Zika, certamente não percebi”, explica de seu leito na Maternidade Dom Pedro II, parte do Instituto Materno Infantil de Pernambuco (IMIP).

Ela afirma que o programa do governo para fornecer repelente contra insetos gratuitamente a gestantes nunca chegou à sua comunidade. Em uma região agrícola carente no estado de Pernambuco, o vilarejo de Sertãozinho de Baixo, onde Silvana mora, tem um posto de saúde “que fica mais fechado que aberto”; com a maternidade mais próxima a 20 km de distância por estradas de terra esburacadas, ela fez uma única ultrassonografia obstétrica, que não detectou problema algum.

Embora elogie os cuidados recebidos desde a chegada naquele é um centro de referência de cuidados maternos na pobre região nordestina do país, a história da Silvana destaca os problemas que o sistema de saúde pública brasileiro vem tendo para enfrentar a epidemia de Zika, ligada ao aumento dos casos de microcefalia.

Foi só em setembro do ano passado que os médicos começaram a relatar um aumento alarmante no número de bebês nascidos com microcefalia. Em novembro, foi estabelecida uma possível ligação com a epidemia de Zika quando os testes de duas mulheres cujos bebês mostravam sinais de microcefalia revelaram altos níveis do vírus no líquido amniótico. Desde 23 de fevereiro, 4107 casos foram relatados para investigação, 583 dos com associação confirmada com o vírus da Zika e 950 descartados, segundo números do Ministério da Saúde. O governo federal trava uma

intensa batalha contra o mosquito *Aedes aegypti*, destacando forças militares para ajudar comunidades a eliminar os focos de reprodução. Mas a grave crise financeira já havia colocado o sistema público de saúde sob intensa pressão antes mesmo de a epidemia de Zika atingi-lo.

## Serviços sobrecarregados

“Dentro do Sistema Único de Saúde (o SUS, semelhante ao NHS, na Inglaterra), existem ilhas de excelência em hospitais-escola, como o Dom Pedro II, e os vinculados a universidades. Mas, no geral, a qualidade deixa muito desejar para os mais necessitados”, lamenta Adriana Scavuzzi, coordenadora de saúde da mulher no IMIP. “O Zika acertou em cheio um sistema de maternidades já caótico. É desolador ver mulheres passando por essa situação, pois o cuidado posterior com elas será muito ruim.”

Mesmo no Dom Pedro II, relativamente bem-equipado, os médicos reportam um sistema extenuado com as demandas extras agora impostas pela epidemia, com mulheres ansiosas exigindo ultrassonografias a qualquer sinal de doença. “A atual demanda por ultrassonografias é maior que nossa capacidade, mas procuramos fazer o máximo possível, trabalhar mais horas, agindo como podemos para ajudar as mães”, diz Alex Souza, da unidade de saúde fetal do IMIP.

Como parte do problema, Alex destaca a demora em receber os resultados dos testes de Zika. “Não temos a velocidade e agilidade de que precisamos. Os resultados da ultrassonografia são imediatos, enquanto os exames de sangue e urina podem demorar de 15 dias a um mês. As autoridades sabem do que precisamos, mas os recursos são escassos.”

Zika e microcefalia atingem mais as comunidades carentes, onde é maior a probabilidade de serviços de saneamento básico e abastecimento d’água serem ruins – somente metade das residências do país têm esgoto encanado. E a crise no sistema de saúde pública piora quanto mais você se afasta das capitais estaduais, como o Recife. “Mesmo antes da Zika, o interior carecia de médicos, enfermeiros e especialistas. A capacidade de identificar fetos com microcefalia fica com-

prometida, pois várias cidades rurais só fazem ultrassonografia obstétrica e, para qualquer coisa mais sofisticada, é necessário enviar a mulher à capital”, explica Souza.

A distribuição desigual dos recursos limitados do serviço de saúde pública brasileiro não é apenas barreira urbano/rural. O hospital recifense Agamenon Magalhães não se encaixa nas ilhas de excelência mencionadas por Scavuzzi. Um breve passeio pelos corredores do hospital deixam claro por que as autoridades de saúde de Pernambuco encaminham a imprensa para outros locais.

No Agamenon Magalhães, as áreas de espera do ambulatório ficam abarrotadas desde muito cedo pela manhã, enquanto um dos corredores da ala da maternidade está repleto de gestantes prestes a parir sentadas em carrinhos e cadeiras de rodas, algumas tomando medicamento na veia. Profissionais da saúde comentam extraoficialmente (pois não foram autorizados a conversar com a imprensa) sobre falta de pessoal e de recursos, exacerbados pela epidemia de Zika.

Uma paciente, Viviane de la Ponte, teve febre e erupção cutânea no primeiro trimestre. Ela e o marido, Thiago, temem que ela tenha contraído o vírus da Zika, com possíveis implicações para o bebê que carrega. “Estamos esperando há um mês pelos resultados do teste para sabermos o que ela teve. Ela fez um teste em novembro e ainda não recebemos os resultados. O SUS é horrível, desorganizado”, diz.

Apesar de elogiarem o sucesso do sistema de notificação de saúde pública brasileiro, que rapidamente percebeu o pico de casos de microcefalia e a provável ligação com a epidemia de Zika, pesquisadores reconhecem tensões no sistema.

“Em Pernambuco, as autoridades de saúde implementaram procedimentos impecáveis e informaram rapidamente a população quanto ao que fazer. Mas em termos de implementação em todo o SUS, estamos vendo falta de recursos, pois houve um aumento na demanda por serviços específicos”, diz Laura Rodrigues, professora da London School of Hygiene and Tropical Medicine que lidera uma das forças-tarefa contra a Zika no seu país-natal, o Brasil.

## Riscos de aborto

Médicos e defensores dos direitos da mulher no Brasil concordam que a epidemia de Zika ainda provocará um aumento identificável no número de abortos ilegais no Brasil, e consideram que seja apenas uma questão de tempo.

A epidemia deflagrou uma batalha entre ativistas pró-aborto e antiaborto no país, onde o procedimento é permitido somente em casos de estupro, risco à vida da mãe ou anencefalia. Apesar disso, e mesmo sendo o Brasil um país tradicionalmente católico com uma população evangélica crescente, o aborto é comum: estimativas apontam que ocorrem de 100 000 a mais de um milhão ao ano. Um estudo feito por pesquisadores locais usando a metodologia do Instituto Guttmacher estimou que, em 2013, houve entre 684 000 e 860 000 abortos.<sup>1</sup>

Temendo que mães tentem abortar fetos que possam ter microcefalia, a ala conservadora do Congresso tenta aumentar a punição para mulheres que interrompem a gestação. Mulheres condenadas por aborto estão sujeitas a um a três anos de prisão, e para médicos a pena é de até quatro anos. Enquanto isso, ativistas pelos direitos das mulheres pleiteiam no Supremo Tribunal o direito de aborto para mulheres com sintomas de infecção por Zika.

“Haja vista a incerteza no meio de uma epidemia e a responsabilidade histórica do estado brasileiro por não conseguir eliminar o vetor do mosquito, nossa visão é que essas mulheres têm o direito de escolher, pois muitas delas estão passando por tortura psicológica”, diz Debora Diniz, cofundadora do Instituto de Bioética, que está apresentando o caso ao Supremo.

Ela identifica demora nos exames de sangue, falta de locais para tomografia computadorizada e insuficiência de fonoaudiólogos e fisioterapeutas para bebês nascidos com microcefalia. “É tudo uma questão de orçamento.”

“A situação agora é muito difícil”, afirma Scavuzzi. “Por causa da Zika, o que eu considerava como as piores condições possíveis piorou ainda mais. Mas como médico da linha de frente, não se pode desistir”. Ela teme que, se não houver mais incentivo financeiro,

alguns médicos podem ir para o setor privado. Isso já é um problema no SUS.

O Brasil é destino da maioria dos US\$ 56 milhões (£ 40 milhões; € 52 milhões) que a Organização Mundial da Saúde destinou para a resposta à epidemia de Zika. A incapacidade do Brasil para deter a disseminação do vírus da dengue nos últimos anos, que infectou 1.6 milhão de pessoas e matou mais de 800, foi um mau sinal na batalha para conter a disseminação do Zika, apesar do destacamento de 200 000 militares para as ruas. A conscienci-

zação do público aumentou após uma campanha de saúde pública, na qual a presidente Dilma Rousseff declarou que o país não será derrotado por um mosquito. Em uma recente visita ao Brasil, a presidente da OMS, Margaret Chan, elogiou a reação do governo. Mas o vírus continua a se espalhar para novas regiões, e a OMS prevê que 1.5 milhão de brasileiros serão infectados pelo vírus da Zika este ano. Com uma vacina ainda um pouco distante, o país tem de lidar com o legado de décadas de falta de investimento em saneamento público – as poças de água parada são endêmicas nos bairros pobres onde o mosquito prospera. Embora vital para derrotar o vetor da doença, essa batalha não é rápida, especialmente em um país forçado a cortar investimentos por conta de uma grave crise fiscal.

**Tom Hennigan**, jornalista freelancer  
São Paulo, Brasil  
hennigantom@gmail.com

**Conflitos de interesses:** Eu li e entendi a política do BMJ sobre conflitos de interesses e não tenho nenhum interesse pertinente a declarar.

**Procedência e revisão por pares:** Validada; não revisado por pares externos.

1 Monteiro MFG, Adesse L, Drezett J. Atualização das estimativas da magnitude do aborto induzido, taxas por mil mulheres e razões por 100 nascimentos vivos do aborto induzido por faixa etária e grandes regiões. Brasil, 1995 a 2013 [em português]. *Reprod Clim* 2015;30:11-8.
